# Supplementary material for: Frailty, lifestyle, genetics and dementia risk
Source: HighWire-hosted journal article supplement (doi:10.1136/jnnp-2021-327396), 2021-12-21
Supplement: jnnp-2021-327396supp001_data_supplement.pdf [file jnnp-2021-327396supp001_data_supplement.pdf]

## Supplementary material

1. **Supplementary Table 1. Items included in the frailty index ( $N = 49$ )**
2. **Supplementary Table 2. Descriptive statistics of the analysed sample stratified by sex**

**Supplementary Table 1. Items included in the frailty index (N = 49)**

|                                         |                                           |                                |
|-----------------------------------------|-------------------------------------------|--------------------------------|
| 1. Glaucoma                             | 18. Diabetes * ^                          | 35. Any cancer diagnosis       |
| 2. Cataracts                            | 19. Coronary heart disease * ^            | 36. Multiple cancers diagnosed |
| 3. Hearing difficulty ^                 | 20. Angina * ^                            | 37. Chest pain * ^             |
| 4. Migraine                             | 21. Stroke * ^                            | 38. Head and/or neck pain      |
| 5. Dental problems ^                    | 22. High blood pressure * ^               | 39. Back pain                  |
| 6. Self-rated health                    | 23. Deep-vein thrombosis * ^              | 40. Stomach/abdominal pain     |
| 7. Fatigue                              | 24. High cholesterol * ^                  | 41. Hip pain                   |
| 8. Sleeplessness/insomnia ^             | 25. Breathing (wheeze)                    | 42. Knee pain                  |
| 9. Depressed feelings ^                 | 26. Pneumonia                             | 43. Whole-body pain            |
| 10. Self-described nervous personality  | 27. Chronic bronchitis/emphysema ^        | 44. Facial pain                |
| 11. Severe anxiety/panic attacks ^      | 28. Asthma                                | 45. Hypothyroidism ^           |
| 12. Loneliness ^                        | 29. Rheumatoid arthritis                  | 46. Gastric reflux             |
| 13. Misery                              | 30. Osteoarthritis                        | 47. Hiatus hernia              |
| 14. Long-standing illness or disability | 31. Gout                                  | 48. Gall stones                |
| 15. Falls                               | 32. Osteoporosis                          | 49. Diverticulitis             |
| 16. Fractures/broken bones              | 33. Hayfever, allergic rhinitis or eczema |                                |
| 17. Sciatica                            | 34. Psoriasis                             |                                |

Note: Cardiovascular health deficits marked with \* were excluded from the calculation of the frailty index in sensitivity analyses. Health deficits marked with ^ represent other causes and risk factors for cognitive decline and were further excluded in sensitivity analyses. Full details of how health deficits were coded are available in: Williams DM, Jylhävä J, Pedersen NL, Hägg S. A frailty index for UK Biobank participants. *J Gerontol A Biol Sci Med Sci* 2019; **74**: 582–587.

**Supplementary Table 2. Descriptive statistics of the analysed sample stratified by sex**

| Characteristic                    | Men<br>(N = 92838) | Women<br>(N = 103285) |
|-----------------------------------|--------------------|-----------------------|
| Age, years, mean (SD)             | 64.2 (2.9)         | 64.0 (2.8)            |
| Incident dementia, No. (%)        | 974 (1)            | 788 (1)               |
| Education level, No. (%) *        |                    |                       |
| Higher                            | 1693 (2)           | 2629 (3)              |
| Upper secondary                   | 51010 (55)         | 53281 (52)            |
| Lower secondary                   | 7956 (9)           | 9790 (10)             |
| Vocational                        | 16536 (18)         | 25157 (24)            |
| Other                             | 15643 (17)         | 12428 (12)            |
| Socioeconomic status, No. (%) *   |                    |                       |
| Least deprived                    | 18857 (20)         | 20355 (20)            |
| Intermediate deprivation          | 55236 (60)         | 62450 (61)            |
| Most deprived                     | 18745 (20)         | 20480 (20)            |
| Third degree relatedness, No. (%) |                    |                       |
| Not related                       | 63917 (69)         | 68857 (67)            |
| Related                           | 28921 (31)         | 34428 (33)            |
| Frailty index                     |                    |                       |
| Score, mean (SD)                  | 0.13 (0.07)        | 0.14 (0.08)           |
| Group, No. (%)                    |                    |                       |
| Low frailty score                 | 62475 (67)         | 65675 (64)            |
| Intermediate frailty score        | 27753 (30)         | 34178 (33)            |
| High frailty score                | 2610 (3)           | 3432 (3)              |
| Polygenic risk                    |                    |                       |
| Z score, mean (SD)                | 0.00 (1.00)        | 0.00 (1.00)           |
| Group, No. (%)                    |                    |                       |
| Low genetic risk                  | 18558 (20)         | 20666 (20)            |
| Intermediate genetic risk         | 55782 (60)         | 61892 (60)            |
| High genetic risk                 | 18498 (20)         | 20727 (20)            |
| Healthy lifestyle *               |                    |                       |
| Score, mean (SD)                  | 2.68 (0.96)        | 2.82 (0.93)           |
| Group, No. (%)                    |                    |                       |
| 0 healthy behaviours              | 1235 (1)           | 856 (1)               |
| 1 healthy behaviour               | 9146 (10)          | 7795 (8)              |
| 2 healthy behaviours              | 27263 (29)         | 26863 (26)            |
| 3 healthy behaviours              | 35818 (39)         | 41529 (40)            |
| 4 healthy behaviours              | 19376 (21)         | 26242 (25)            |

Note: \* Data presented here include imputed values for those that were missing: there were 2514 missing values for education level and 165 missing values for socioeconomic status; we also imputed the missing values of individual components of the healthy lifestyle score prior to its calculation. Proportions may not sum to 100 due to rounding.
